# Supplementary material
Source: Springer Nature journal article supplement (https://www.springermedizin.de/resource/supplementary/12895_2012_135_MOESM2_ESM.pdf/9514180)

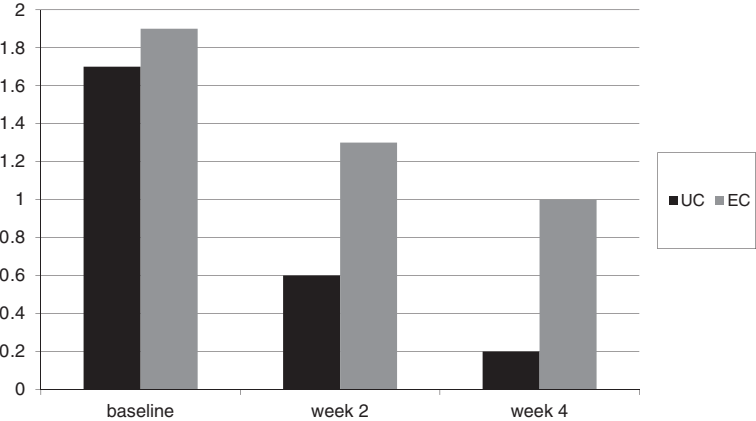

Supplement: MOESM2 [file 9514180]
